# Supplementary material for: Liposomal Taro Lectin Nanocapsules Control Human Glioblastoma and Mammary Adenocarcinoma Cell Proliferation
Source: MDPI journal article supplement (doi:10.3390/molecules24030471), 2019-01-29
Supplement: s1 [file s1]

## Supplementary Material

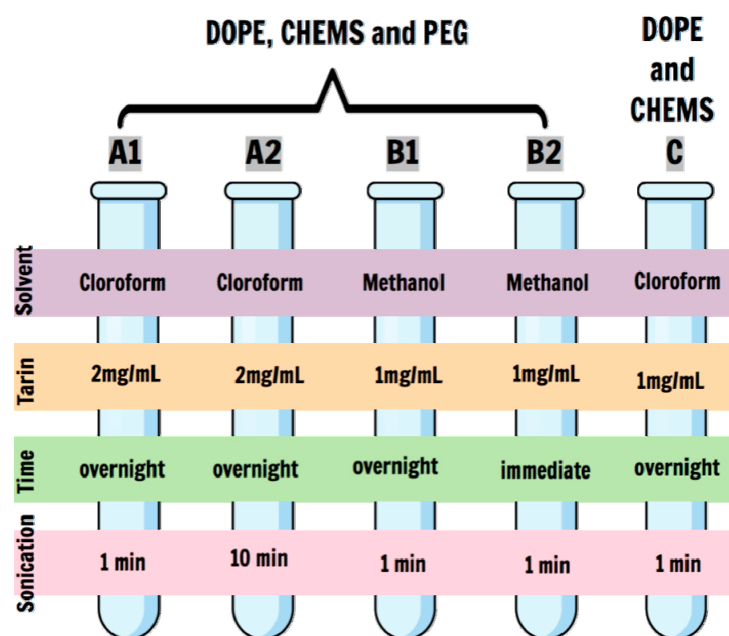

**Figure S1.** Liposomal tarin nanocapsules were prepared following the dos Santos Ferreira et al. [21] protocol with modifications. The basic formulation (A1) was modified according to type of solvent, initial tarin load, sonication and tarin entrapment time, with or without DSPE-PEG (2000). **DSPE-PEG (2000)** - amine 1,2-distearoyl-sn-glycero-3-phosphoethanolamine-N-[amino(polyethylene glycol)-2000] (ammonium salt); **DOPE** - 1,2-dioleoyl-sn-glycerol-3-phosphoethanolamine; **CHEMS** - cholesterylhemisuccinate.
